# Supplementary material for: Weakened CO adsorption and enhanced structural integrity of a stabilized Pt skin/PtCo hydrogen oxidation catalyst analysed by in situ X-ray absorption spectroscopy
Source: Royal Society of Chemistry journal article supplement (doi:10.1039/c7cy01700f), 2017-01-01
Supplement: c7cy01700f1.pdf [file c7cy01700f1.pdf]

## Electronic Supporting Information

### **Weakened CO adsorption and enhanced structural integrity of stabilized Pt skin/PtCo hydrogen oxidation catalyst analysed by in situ X-ray absorption spectroscopy**

*Guoyu Shi,<sup>a</sup> Hiroshi Yano,<sup>b</sup> Donald A. Tryk,<sup>b</sup> Masashi Matsumoto,<sup>c</sup> Hajime Tanida,<sup>c</sup> Masazumi Arao,<sup>c</sup> Hideto Imai,<sup>c</sup> Junji Inukai,<sup>b,d</sup> Akihiro Iiyama,<sup>b</sup> and Hiroyuki Uchida<sup>\*b, c</sup>*

*<sup>a</sup>Interdisciplinary Graduate School of Medicine, Engineering, and Agricultural Science, University of Yamanashi, 4 Takeda, Kofu, 400-8510, Japan*

*<sup>b</sup>Fuel Cell Nanomaterials Center, University of Yamanashi, 4 Takeda, Kofu, 400-8510, Japan*

*<sup>c</sup>Device-Functional Analysis Department, NISSAN ARC Ltd, Kashima-cho, Yokosuka, 237-0061, Japan*

*<sup>d</sup>Clean Energy Research Center, University of Yamanashi, 4 Takeda, Kofu, 400-8510, Japan*

*E-mail: [h-uchida@yamanashi.ac.jp](mailto:h-uchida@yamanashi.ac.jp); Fax: +81-55-220-8618; Tel: +81-55-220-8619*

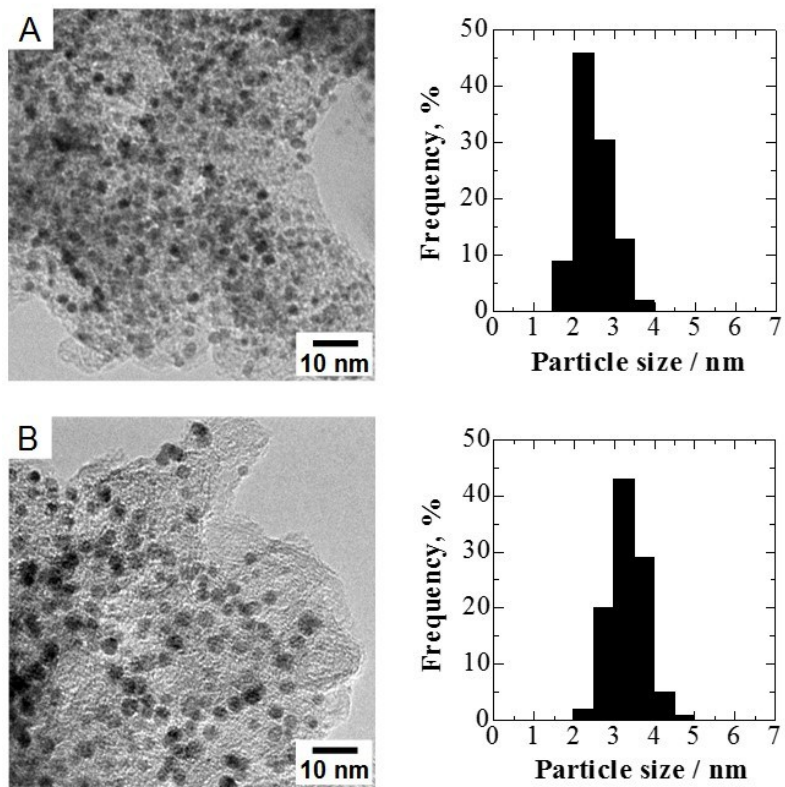

**Figure S1.** TEM images and particle size distribution histograms of Pt/C and Pt<sub>xAL</sub>-PtCo/C catalysts after the electrochemical cleaning.

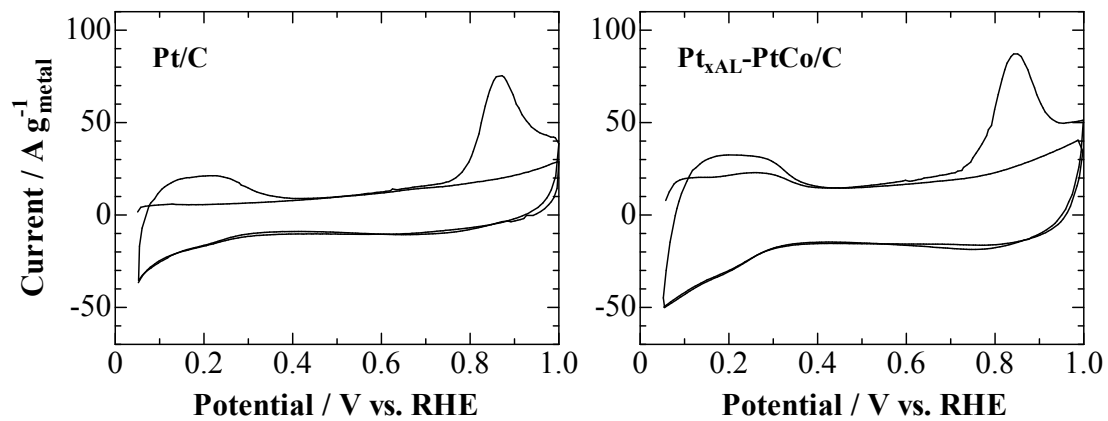

**Figure S2.** CO stripping voltammograms in  $N_2$ -saturated 0.1 M  $HClO_4$  at Pt/C and  $Pt_{xAL}$ -PtCo/C catalysts. Potential scan rate:  $50 \text{ mV s}^{-1}$ .

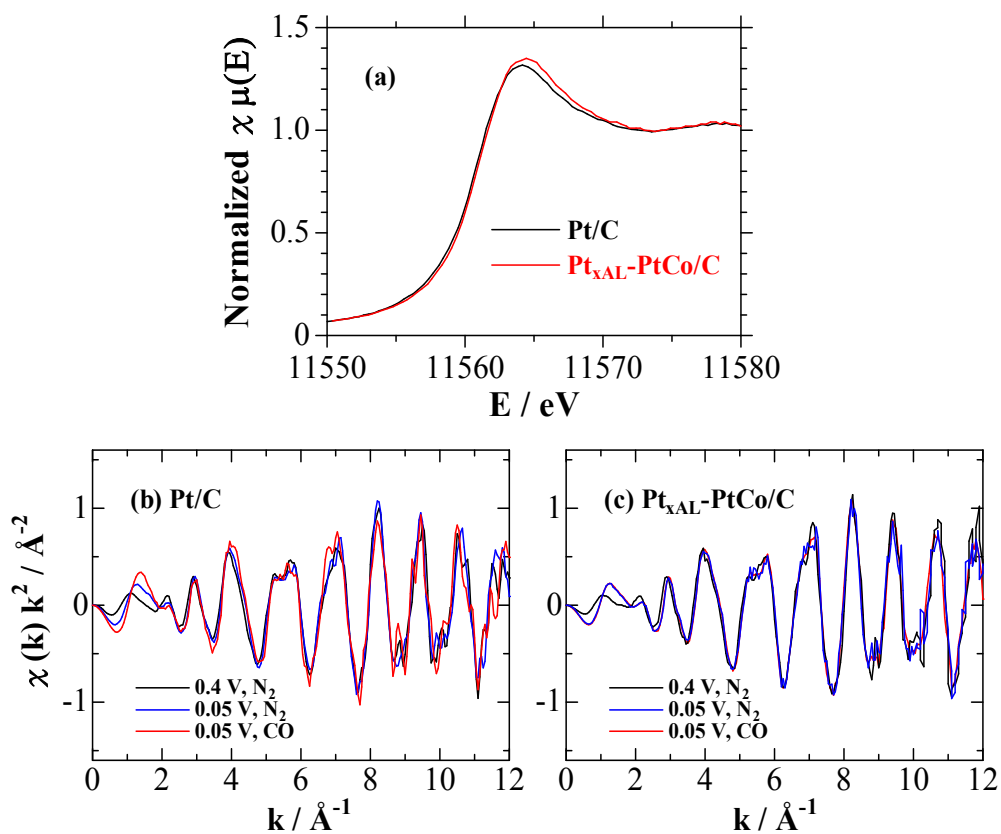

**Figure S3.** In situ XANES spectra (upper figure) at Pt L<sub>3</sub> edges of the Pt/C and Pt<sub>xAL</sub>-PtCo/C catalysts held at 0.40 V in N<sub>2</sub> saturated 0.1 M HClO<sub>4</sub> electrolyte solution (a) and the k<sup>2</sup>-weighted  $\chi(k)$  EXAFS spectra (two bottom figures) for Pt L<sub>3</sub>-edge of Pt/C (b) and Pt<sub>xAL</sub>-PtCo/C (c) under three operating conditions.

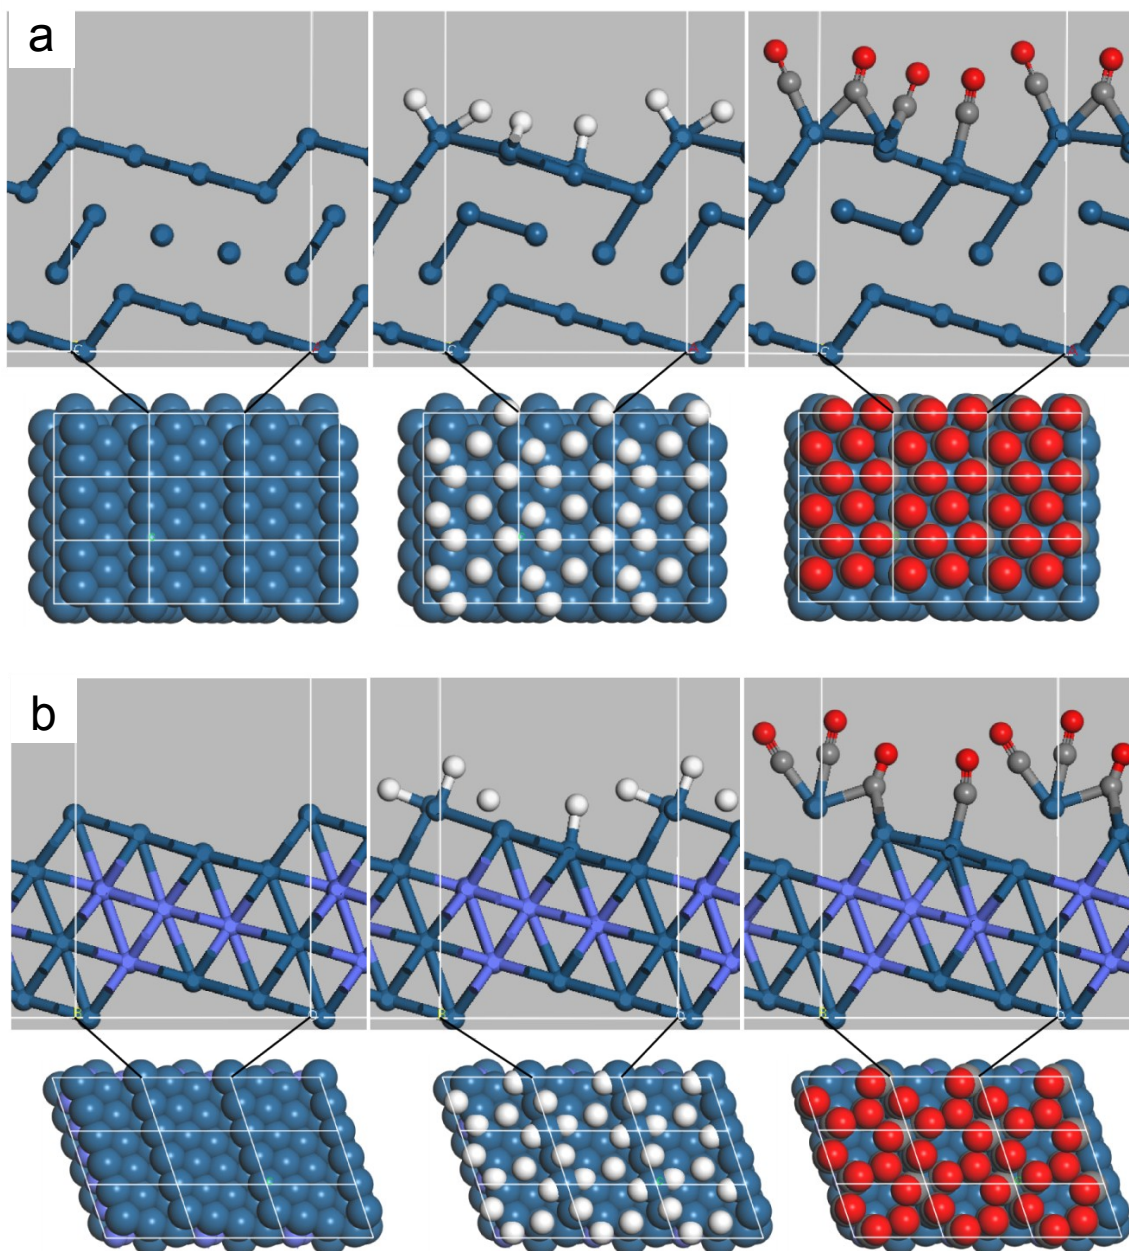

**Figure S4.** Atomic models, side views (upper) and top views (lower) of (a) Pt(221) and (b) Pt<sub>1AL</sub>-PtCo(221) based on unit cell of Pt<sub>24</sub> and Pt<sub>16</sub>Co<sub>8</sub>. From left to right: bare surface, 4H-adsorbed surface and 4CO-adsorbed surface.

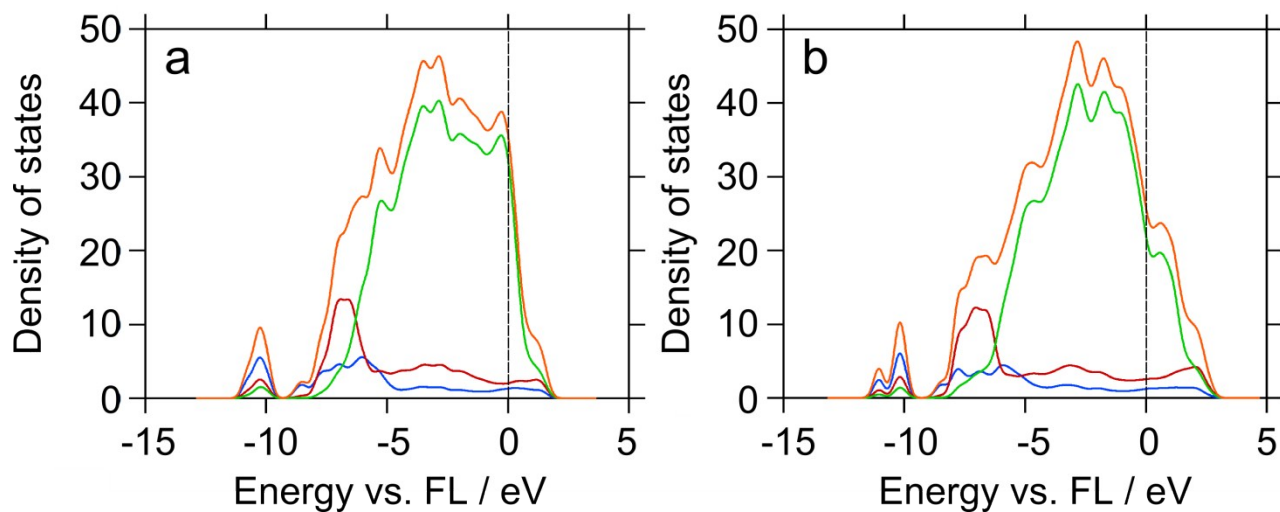

**Figure S5.** Density of states for (a) Pt(221)-4CO and (b) Pt<sub>1AL</sub>-PtCo(221)-4CO; s-projected DOS (blue), p-projected DOS (red), d-projected DOS (green), total DOS (orange).

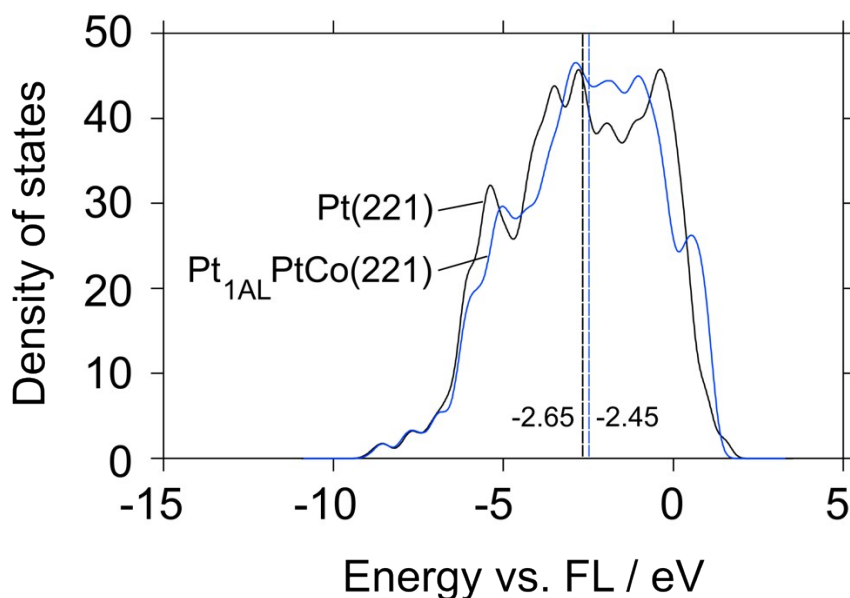

**Figure S6.** Total density of states for bare Pt(221), with a d-band center at -2.65 eV and bare Pt<sub>1AL</sub>-PtCo(221), with a d-band center at -2.45 eV. According to T. Hofmann, T. H. Yu, M. Folse, L. Weinhardt, M. Bar, Y. F. Zhang, B. V. Merinov, D. J. Myers, W. A. Goddard and C. Heske, *J. Phys. Chem. C*, 2012, **116**, 24016, the value for Pt falls within the range of reported theoretical and experimental values. However, according to J. R. Kitchin, J. K. Nørskov, M. A. Barteau and J. G. Chen, *J. Chem. Phys.*, 2004, **120**, 10240, the effect of a subsurface layer of Co would shift the d-band center from -2.44 eV for pure Pt to -2.74 eV. Thus, the present results are at variance with the conventional view of the effect of alloying on the d-band structure.



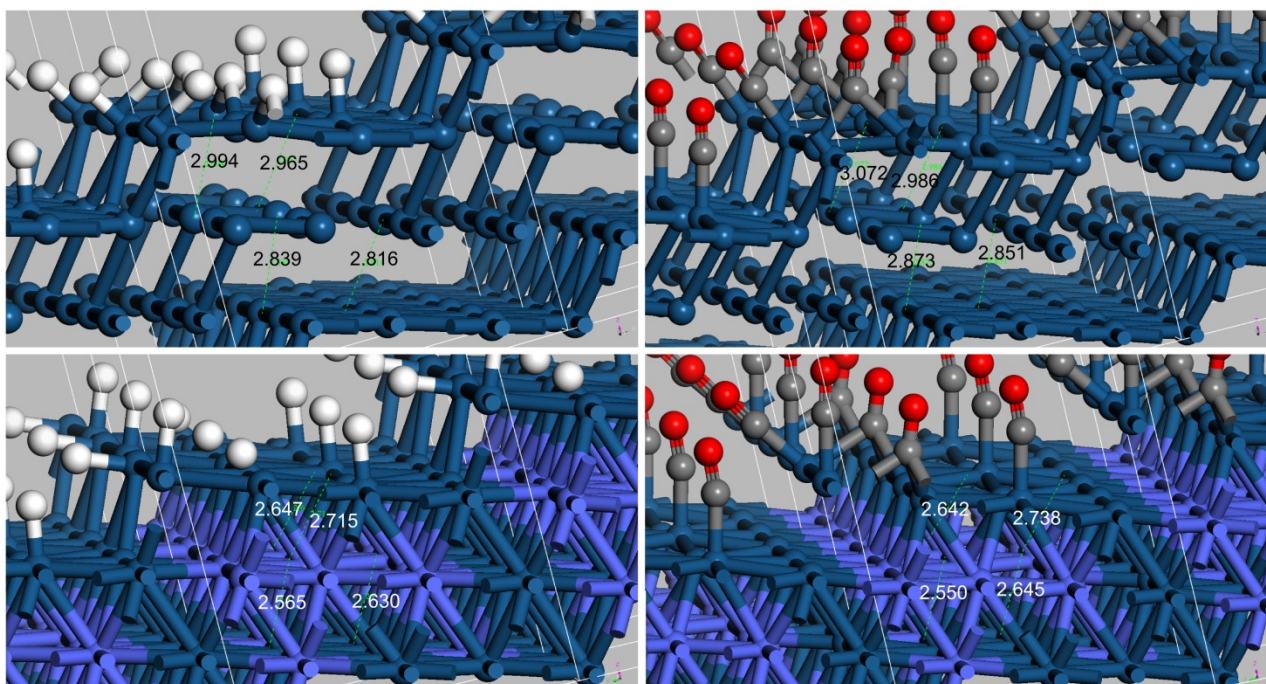

**Figure S7.** Atomic models, side views of Pt(221) (upper) and (b) Pt<sub>1AL</sub>-PtCo(221) (lower) for unit cells of Pt<sub>24</sub> and Pt<sub>16</sub>Co<sub>8</sub>. Left panels show 4H on 6 Pt sites; right panels show 4CO on 6 Pt sites. Representative distances are shown in Å between nearest neighbor atoms in the lower two layers and in the top and middle layers.
